# Supplementary material for: Entwicklung und Validierung der Online-Privatheitskompetenzskala (OPLIS)
Source: Atypon-hosted journal article supplement (doi:10.1026/0012-1924/a000179), 2017-03-10
Supplement: 0012-1924_a000179_esm1.pdf [file 0012-1924_a000179_esm1.pdf]

## **Elektronisches Supplement 1**

**Itemformulierungen, Testanleitung und Normtabellen für  
die Online-Privatheitskompetenzskala (OPLIS)**

## Inhaltsverzeichnis

|                                                                       |           |
|-----------------------------------------------------------------------|-----------|
| <b>1. Allgemeine Informationen .....</b>                              | <b>3</b>  |
| <b>2. Übersicht über die Itemformulierungen .....</b>                 | <b>4</b>  |
| <b>3. Testanleitung, -durchführung und -auswertung.....</b>           | <b>8</b>  |
| 3.1. Generelles Vorgehen .....                                        | 8         |
| 3.2. Auswertung .....                                                 | 9         |
| 3.3. Interpretation des Testergebnisses.....                          | 9         |
| <b>4. Normtabellen</b>                                                | <b>11</b> |
| 4.1. Gesamtpopulations- und geschlechtsspezifische Normtabellen ..... | 11        |
| 4.2. Altersspezifische Normen .....                                   | 12        |
| 4.3. Altersspezifische Normen – Weiblich.....                         | 14        |
| 4.4. Altersspezifische Normen – Männlich .....                        | 16        |
| <b>5. Zusätzliche Abbildungen und Tabellen zur Publikation.....</b>   | <b>18</b> |
| 5.1. Visuelle Darstellung der Kriteriumsvalidierung.....              | 18        |
| 5.2. Soziodemographie der Validierungsstichprobe .....                | 19        |
| <b>Literaturverzeichnis .....</b>                                     | <b>20</b> |

## **1. Allgemeine Informationen**

OPLIS ist eine 20 Fragen umfassende Skala zur Erfassung von Online-Privatheitskompetenz. Unter [www.oplis.de](http://www.oplis.de) finden Sie weitere Materialien und Informationen zur Verwendung der Skala. Die Skala steht unter Urheberrecht, kann jedoch ohne Erlaubnis benutzt werden, solange der entsprechende Artikel zitiert wird.

## 2. Übersicht über die Itemformulierungen

Tabelle 1. Itemformulierungen und Itemschwierigkeiten für die Dimension 1: Wissen über institutionelle Praktiken

| Label  | Item                                                                                                                                         | Antwort                           | Itemschwierigkeit |
|--------|----------------------------------------------------------------------------------------------------------------------------------------------|-----------------------------------|-------------------|
| PRA_01 | Die National Security Agency (NSA) greift nur auf Nutzerdaten zu, die öffentlich und für jedermann zugänglich sind.                          | wahr / <b>falsch</b> / weiß nicht | .61               |
| PRA_02 | Betreiber sozialer Netzwerke (z. B. Facebook) sammeln und verarbeiten auch Informationen von Personen, die dieses Netzwerk gar nicht nutzen. | <b>wahr</b> / falsch / weiß nicht | .46               |
| PRA_03 | Daten, die Betreiber sozialer Netzwerke (z. B. Facebook) über die Nutzer sammeln, werden nach 5 Jahren gelöscht.                             | wahr / <b>falsch</b> / weiß nicht | .55               |
| PRA_04 | Unternehmen kombinieren Daten, die auf verschiedenen Websites im Internet hinterlassen werden und stellen daraus Nutzerprofile zusammen.     | <b>wahr</b> / falsch / weiß nicht | .67               |
| PRA_05 | E-Mails werden häufig über mehrere Rechner weitergeleitet, bevor sie bei ihrem eigentlichen Empfänger ankommen.                              | <b>wahr</b> / falsch / weiß nicht | .50               |

Tabelle 2. Itemformulierungen und Itemschwierigkeiten für die Dimension 2: Wissen über technische Aspekte des Datenschutzes

| Label  | Item                                                   | Antwort                                                                                                                                                                                                                                                                                                                                                                                               | Itemschwierigkeit |
|--------|--------------------------------------------------------|-------------------------------------------------------------------------------------------------------------------------------------------------------------------------------------------------------------------------------------------------------------------------------------------------------------------------------------------------------------------------------------------------------|-------------------|
| TEC_01 | Was verbirgt sich hinter dem Begriff „Browserverlauf“? | Im Browserverlauf werden...<br><b>A. ...die Adressen der besuchten Websites gespeichert.</b><br>B. ...Cookies von besuchten Websites abgelegt.<br>C. ...potenziell infizierte Websites separat abgelegt.<br>D. ...je nach Browsertyp unterschiedliche Informationen über den Nutzer gespeichert.                                                                                                      | .80               |
| TEC_02 | Was ist ein „Cookie“?                                  | <b>A. Eine Text-Datei, die es Websites ermöglicht, den Nutzer beim erneuten Besuch wiederzuerkennen.</b><br>B. Ein Programm, mit dem man die Datenspeicherung von Web-Anbietern unterbinden kann.<br>C. Ein Computer-Virus, das man sich beim Besuch einer Website einfangen kann.<br>D. Ein Browser-Plugin, das sicheres Surfen gewährleistet.                                                       | .72               |
| TEC_03 | Was versteht man unter dem Begriff „Cache“?            | <b>A. Einen Puffer-Speicher, der das Surfen im Internet beschleunigt.</b><br>B. Ein Programm, welches Daten über den Internetnutzer gezielt ausspioniert und an Dritte weiterleitet.<br>C. Ein Programm, welches Daten auf eine externe Festplatte kopiert, um diese vor Datenklau zu schützen.<br>D. Ein Browser-Plug-In, welches den Datentransfer beim Surfen verschlüsselt.                       | .57               |
| TEC_04 | Was versteht man unter einem „Trojaner“?               | Ein Trojaner ist ein Computerprogramm, dass...<br><b>A. ... als nützliche Anwendung getarnt ist, im Hintergrund aber eine andere Funktion erfüllt.</b><br>B. ... den Rechner vor Viren und anderen Schadprogrammen schützt.<br>C. ... nur zum Spaß entwickelt wurde und keine spezifische Funktion hat.<br>D. ... als Computervirus in den 90ern Schaden anrichtete, heute aber nicht mehr existiert. | .73               |
| TEC_05 | Was ist eine „Firewall“?                               | <b>A. Ein Sicherungssystem, das den Computer vor unerwünschten Netzangriffen schützen soll.</b><br>B. Ein veraltetes Schutzprogramm gegen Computer-Viren.<br>C. Ein Browser-Plugin, das sicheres Surfen ermöglicht.<br>D. Eine neue technische Entwicklung, die verhindert, dass Daten bei einem Kurzschluss verloren gehen.                                                                          | .88               |

Tabelle 3. Itemformulierungen und Itemschwierigkeiten für die Dimension 3: Wissen über Datenschutzrecht

| Label  | Item                                                                                                                                                                                   | Antwort                                                                                                                                                                                                                                                                                                                     | Itemschwierigkeit |
|--------|----------------------------------------------------------------------------------------------------------------------------------------------------------------------------------------|-----------------------------------------------------------------------------------------------------------------------------------------------------------------------------------------------------------------------------------------------------------------------------------------------------------------------------|-------------------|
| GES_01 | Die Weiterleitung anonymisierter Nutzerdaten zu Marktforschungszwecken ist in der EU gesetzlich erlaubt.                                                                               | <b>wahr</b> / falsch / weiß nicht                                                                                                                                                                                                                                                                                           | .43               |
| GES_02 | Die EU-Richtlinien zum Datenschutz...                                                                                                                                                  | <b>A. ... müssen von allen EU-Ländern in das nationale Datenschutzgesetz implementiert werden.</b><br>B. ... existieren bisher noch nicht.<br>C. ... gelten als länderübergreifendes EU-Datenschutzgesetz.<br>D. ... geben den EU-Ländern lediglich eine unverbindliche Orientierung hinsichtlich ihrer Datenschutzgesetze. | .29               |
| GES_03 | Für alle sozialen Netzwerkseiten gelten in Deutschland die gleichen Standard-AGBs. Abweichungen müssen von den Betreibern kenntlich gemacht werden.                                    | wahr / <b>falsch</b> / weiß nicht                                                                                                                                                                                                                                                                                           | .28               |
| GES_04 | Laut dem deutschen Gesetz haben Nutzer von Online-Anwendungen, die personenbezogene Daten erheben und verarbeiten, einen Anspruch darauf, die über sie gespeicherten Daten einzusehen. | <b>wahr</b> / falsch / weiß nicht                                                                                                                                                                                                                                                                                           | .53               |
| GES_05 | Informationelle Selbstbestimmung ist...                                                                                                                                                | <b>A. ... ein Grundrecht deutscher Bürger.</b><br>B. ... ein philosophischer Begriff.<br>C. ... die zentrale Forderung datenverarbeitender Stellen.<br>D. ...die zentrale Aufgabe des Bundesdatenschutzbeauftragten.                                                                                                        | .50               |

Tabelle 4. Itemformulierungen und Itemschwierigkeiten für die Dimension 4: Wissen über Datenschutzstrategien

| Label  | Item                                                                                                                                                                                                                                                                | Antwort                           | Itemschwierigkeit |
|--------|---------------------------------------------------------------------------------------------------------------------------------------------------------------------------------------------------------------------------------------------------------------------|-----------------------------------|-------------------|
| STR_01 | Das Nachverfolgen der eigenen Internetnutzung kann durch das regelmäßige Löschen von Browserinformationen (Cookies, Cache, Browserverlauf) erschwert werden.                                                                                                        | <b>wahr</b> / falsch / weiß nicht | .67               |
| STR_02 | Durch das Surfen im „Private Browsing“-Modus kann die Rekonstruktion des eigenen Surfverhaltens erschwert werden, da keine Browserinformationen gespeichert werden.                                                                                                 | <b>wahr</b> / falsch / weiß nicht | .47               |
| STR_03 | Durch die Nutzung von falschen Namen oder Pseudonymen kann die Identifikation der eigenen Person im Internet zumindest erschwert werden.                                                                                                                            | <b>wahr</b> / falsch / weiß nicht | .59               |
| STR_04 | Auch wenn selbst schwere Passwörter von IT-Profis geknackt werden können, ist es sinnvoll Passwörter zu verwenden, die aus einer Kombination aus Buchstaben, Zahlen und Sonderzeichen bestehen und keine Wörter, Namen oder einfache Zahlenkombinationen enthalten. | <b>wahr</b> / falsch / weiß nicht | .80               |
| STR_05 | Um den Zugang zu eigenen Daten zu erschweren, sollte man verschiedene Passwörter und Benutzernamen für unterschiedliche Anwendungen nutzen und diese häufig ändern.                                                                                                 | <b>wahr</b> / falsch / weiß nicht | .81               |

*Anmerkungen.* Die richtige Antwort ist jeweils fett gedruckt. In der Befragung wurden die Antwortoptionen A bis D bei den Multiple-Choice-Fragen rotiert. In der Tabelle steht jeweils die richtige Antwort an Stelle der Antwortoption A. Ebenso wurde die Reihenfolge der Wissensfragen randomisiert.

### **3. Testanleitung, -durchführung und -auswertung**

Die nachfolgenden Anleitungen sind vorrangig zur Diagnostik der individuellen Online-Privatheitskompetenz gedacht. Es geht also darum, jedem Testanden einen individuellen Testwert zuzuordnen, mit dessen Hilfe die individuelle Testleistung in Abhängigkeit zur jeweiligen Vergleichsgruppe evaluiert werden kann. Sollte OPLIS dagegen als Variable in wissenschaftlichen Befragungen eingesetzt werden, so empfehlen wir die im Artikel dargestellte Operationalisierung als Second-Order- (wenn nur der Globalfaktor von Interesse ist) oder als Bi-Faktor-Modell (wenn auch die Subdimensionen von Interesse sind).

#### **3.1. Generelles Vorgehen**

OPLIS kann grundsätzlich als Einzeltest als auch als Gruppentest durchgeführt werden. Bei der Testdurchführung in größeren Gruppen sollte darauf geachtet werden, dass die Testleiterin bzw. der Testleiter alle Teilnehmenden sehen und ohne Beeinträchtigung der anderen Teilnehmenden erreichen kann.

Um ein möglichst valides Testergebnis zu erhalten, sollte darauf geachtet werden, dass keine Hilfsmittel (z. B. Smartphones) bei der Bearbeitung benutzt werden. Die Bearbeitung des Tests dauert in der Regel nicht länger als 15 bis 20 Minuten. Für die Auswertung der Ergebnisse, sowie die Rückmeldung an die Teilnehmenden sollte entsprechend Zeit eingeplant werden.

Die folgenden Vorgaben zur Durchführung und Auswertung des Tests beziehen sich auf eine sogenannte Paper-Pencil-Testung und sind für Einzel- und Gruppentestungen identisch. Selbstverständlich kann der Test jedoch auch computergestützt durchgeführt werden. Bei beiden Verfahren ist zu beachten, dass der dargestellte Ablauf sowie die beschriebene Auswertung exakt eingehalten werden sollte.

#### ***Erläuterung der Ziele und Testsituation***

Zu Beginn sollte den Teilnehmenden der Grund des Testeinsatzes sowie die Ziele des Verfahrens erklärt werden. Auf diese Weise wird die Unsicherheit auf Seiten der Teilnehmer reduziert. Gleichzeitig sollte die Art und Weise der Ergebnismeldung bereits an dieser Stelle erläutert werden. Ebenfalls sollten die Teilnehmenden über die Nutzung der Daten sowie die zugrunde liegenden Datenschutzrichtlinien informiert werden.

#### ***Ausgabe der Fragebögen***

Unter [www.oplis.de](http://www.oplis.de) steht ein Musterfragebogen zum Download zur Verfügung. Prinzipiell können die Fragen aber auch in ein eigenes Layout überführt werden. Wichtig ist hier allerdings, dass die Position der richtigen Antwort bei den Multiple-Choice-Fragen variiert wird.

Alle Teilnehmenden erhalten je einen Fragebogen.

#### ***Instruktion der Teilnehmenden***

Nach der Ausgabe der Fragebögen sollte die nachfolgende Instruktion von der Testleiterin bzw. dem Testleiter vorgelesen werden:

„Sie sollten nun alle einen Fragebogen vor sich liegen haben. Bitte notieren Sie zunächst ihren Namen auf dem Antwortbogen. Sie haben nun die Möglichkeit, Fragen zu stellen. Ich weise Sie darauf hin, dass während der Testphase keine Fragen beantwortet werden können, um die anderen Teilnehmenden nicht zu irritieren. Wenn es keine weiteren Fragen gibt, beginnen Sie nun mit der Bearbeitung der Aufgaben.“

#### ***Testende***

Nachdem der oder die letzte Teilnehmende den Test beendet hat, werden die Fragebögen von der Testleiterin bzw. dem Testleiter eingesammelt. Die Teilnehmenden werden anschließend über das weitere Vorgehen informiert und entlassen.



### 3.2. Auswertung

Die Auswertung der Fragebögen sollte wenn möglich im Anschluss an die Testung durchgeführt werden. Prinzipiell werden die richtigen Antworten eines Testanden ausgezählt und zu einem Summenscore addiert. Damit kann der Gesamtscore Online-Privatheitskompetenz ermittelt werden. Leistungen in den einzelnen Subdimensionen sind basierend auf dem Gesamtscore nicht beurteilbar.<sup>1</sup>

Konkret erhalten richtige Antworten die Punktzahl „1“ und falsche Antworten die Punktzahl „0“. Fragen, bei denen keine oder mehrere Antworten angekreuzt wurden, werden ebenfalls als falsch bewertet. Anschließend wird die Anzahl der richtigen Antworten aufsummiert.

### 3.3. Interpretation des Testergebnisses

Die ermittelten Rohwerte (Summenscores) sind für sich nicht zu interpretieren. Um die Rohwerte der Teilnehmenden angemessen beurteilen zu können, muss eine geeignete Normtabelle ausgewählt werden (Tabelle 5 bis 8).

Unter Punkt 4 sind fünf Normtabellen abgetragen. Neben Normen für die Gesamtpopulation deutscher Internetnutzer, finden Sie Normwerte für Frauen und Männer sowie einzelne Altersgruppen. Je nach Erkenntnisinteresse können somit unterschiedliche Vergleichsgruppen herangezogen werden. Für jeden Probanden sollte stets die geeignete Norm ausgewählt werden. Die Tabellen enthalten die folgenden Werte:

|                   |                                                                                                                                                                   |
|-------------------|-------------------------------------------------------------------------------------------------------------------------------------------------------------------|
| <i>RW</i>         | Rohwert: entspricht dem Testergebnis (d. h. Anzahl der richtigen Antworten).                                                                                      |
| <i>OPLIS-Wert</i> | Normskala zur einfachen Interpretation: Der durchschnittliche Mittelwert der Vergleichsgruppe liegt stets bei $MW=100$ . Die Standardabweichung beträgt $SA=15$ . |
| <i>PR</i>         | Prozentrang: bemisst, wie viel Prozent der Vergleichsgruppe ein solches oder niedrigeres Testergebnis erreicht haben.                                             |

Sollte eine unterdurchschnittliche Leistung festgestellt werden, so sollte die Testleiterin bzw. der Testleiter mögliche Ursachen (z. B. Einflussfaktoren wie Motivation, Testsituation, gesundheitliche Beeinträchtigungen, ...) berücksichtigen.

#### **Interpretationsbeispiel**

Nehmen wir an, dass eine Teilnehmende einen Rohwert (RW) von 11 (d. h. 11 von 20 Fragen wurden richtig beantwortet) erreicht hat. Möchte man nun das Ergebnis im Vergleich zur Gesamtpopulation bewerten (vgl. Tabelle 5), so sieht man zunächst, dass die Teilnehmende einen OPLIS-Wert von 97 hat, was knapp unter dem

<sup>1</sup> Grundsätzlich sollte bei der Berechnung des Testscores die latente Struktur des Konzeptes erhalten bleiben. Zur Berechnung eines entsprechenden Faktorscores gibt es verschiedene einfache und komplexe Verfahren (DiStefano, Zhu, and Mîndrilă, 2009). Wir haben uns hier für den einfachen Summenscore entschieden, da er einfacher zu berechnen und zu interpretieren ist und trotz bekannter Schwächen sehr stark mit dem aus dem Bi-Faktor-Modell extrahierten Faktorscore für den Globalfaktor korreliert:  $r = .98$  (Schätzung der Faktorscores gemäß Muthén, 1998-2004). Die hohe Korrelation ist durch die hohe gemeinsam erklärte Varianz ( $ECV = .69$ , vgl. Ergebnisse Studie 3 im Artikel) zu erklären. Die Subdimensionen können analog verrechnet werden, allerdings ist hierbei zu beachten, dass die Summenscores sowohl die spezifische Varianz der Subdimensionen, als auch anteilig die gemeinsame Varianz, die im Bi-Faktor-Modell durch den Globalfaktor herausgerechnet wird, beinhalten. Dies bedeutet, dass die Summenscores der einzelnen Subdimensionen stark miteinander korrelieren. Besteht das Interesse unabhängig von der gemeinsamen Varianz aller Items, spezifische Testscores für die Subdimensionen zu berechnen (wie im Bi-Faktor-Modell geschätzt), so sollte ein entsprechend komplexeres Verfahren angewandt werden (vgl. Muthén, 1998-2004).

Durchschnitt von 100 Punkten liegt. Des Weiteren lässt sich am Prozentrang ablesen, dass die Teilnehmende besser als 34 Prozent der Gesamtpopulation abgeschnitten hat.

Nehmen wir nun an, es handelt sich hierbei um eine 65 Jahre alte Frau. Werden alle Frauen als Vergleichsgruppe herangezogen, sieht man, dass die Teilnehmende mit 11 richtigen Antworten nun einen OPLIS-Wert von 100 erreicht und damit eine durchschnittliche Leistung erbracht hat. Vergleicht man sie gegen ihre Altersgruppe (Männer und Frauen, vgl. Tabelle 6), sieht man dagegen, dass sie mit einen OPLIS-Wert von 98 wiederum als leicht unterdurchschnittlich einzuordnen ist.

Ein ähnliches Ergebnis zeigt sich, wenn man die genaue Vergleichsgruppe (Über 60-jährige Frauen, vgl. Tabelle 7) heranzieht. Mit einem OPLIS-Wert von 99 ist die Leistung als durchschnittlich einzuordnen.

#### 4. Normtabellen

##### 4.1. Gesamtpopulations- und geschlechtsspezifische Normtabellen

Tabelle 5. Gesamtpopulations- und geschlechtsspezifische Normen

| Gesamtpopulation<br>(N = 1.945) |                |     | Frauen<br>(n = 933) |                |     | Männer<br>(n = 1.004) |                |     |
|---------------------------------|----------------|-----|---------------------|----------------|-----|-----------------------|----------------|-----|
| RW                              | OPLIS-<br>Wert | PR  | RW                  | OPLIS-<br>Wert | PR  | RW                    | OPLIS-<br>Wert | PR  |
| 0                               | 61             | 2   | 0                   | 63             | 2   | 0                     | 59             | 2   |
| 1                               | 65             | 3   | 1                   | 66             | 3   | 1                     | 62             | 3   |
| 2                               | 68             | 4   | 2                   | 70             | 4   | 2                     | 66             | 4   |
| 3                               | 71             | 6   | 3                   | 73             | 7   | 3                     | 69             | 6   |
| 4                               | 74             | 9   | 4                   | 76             | 10  | 4                     | 72             | 7   |
| 5                               | 78             | 11  | 5                   | 80             | 13  | 5                     | 75             | 9   |
| 6                               | 81             | 15  | 6                   | 83             | 18  | 6                     | 79             | 12  |
| 7                               | 84             | 18  | 7                   | 86             | 22  | 7                     | 82             | 15  |
| 8                               | 88             | 22  | 8                   | 90             | 27  | 8                     | 85             | 18  |
| 9                               | 91             | 27  | 9                   | 93             | 33  | 9                     | 88             | 22  |
| 10                              | 94             | 34  | 10                  | 97             | 40  | 10                    | 92             | 28  |
| 11                              | 97             | 42  | 11                  | 100            | 50  | 11                    | 95             | 34  |
| 12                              | 101            | 50  | 12                  | 103            | 58  | 12                    | 98             | 42  |
| 13                              | 104            | 58  | 13                  | 107            | 67  | 13                    | 101            | 50  |
| 14                              | 107            | 67  | 14                  | 110            | 76  | 14                    | 105            | 59  |
| 15                              | 110            | 77  | 15                  | 113            | 84  | 15                    | 108            | 69  |
| 16                              | 114            | 84  | 16                  | 117            | 90  | 16                    | 111            | 78  |
| 17                              | 117            | 91  | 17                  | 120            | 95  | 17                    | 114            | 88  |
| 18                              | 120            | 96  | 18                  | 124            | 98  | 18                    | 118            | 95  |
| 19                              | 123            | 99  | 19                  | 127            | 100 | 19                    | 121            | 99  |
| 20                              | 127            | 100 | 20                  | 130            |     | 20                    | 124            | 100 |

## 4.2. Altersspezifische Normen

Tabelle 6. Altersspezifische Normen

| Unter 20 Jahre<br>(n = 133) |                |     | 20 bis 39 Jahre<br>(n = 696) |                |     | 40 bis 59 Jahre<br>(n = 876) |                |     |
|-----------------------------|----------------|-----|------------------------------|----------------|-----|------------------------------|----------------|-----|
| RW                          | OPLIS-<br>Wert | PR  | RW                           | OPLIS-<br>Wert | PR  | RW                           | OPLIS-<br>Wert | PR  |
| 0                           | 65             | 2   | 0                            | 62             | 2   | 0                            | 61             | 2   |
| 1                           | 68             | 3   | 1                            | 65             | 3   | 1                            | 64             | 3   |
| 2                           | 72             | 5   | 2                            | 69             | 4   | 2                            | 67             | 4   |
| 3                           | 75             | 10  | 3                            | 72             | 7   | 3                            | 71             | 5   |
| 4                           | 78             | 14  | 4                            | 75             | 9   | 4                            | 74             | 8   |
| 5                           | 81             | 17  | 5                            | 78             | 12  | 5                            | 77             | 11  |
| 6                           | 84             | 20  | 6                            | 81             | 15  | 6                            | 81             | 14  |
| 7                           | 88             | 24  | 7                            | 84             | 19  | 7                            | 84             | 18  |
| 8                           | 91             | 25  | 8                            | 87             | 22  | 8                            | 87             | 22  |
| 9                           | 94             | 35  | 9                            | 90             | 27  | 9                            | 90             | 26  |
| 10                          | 97             | 42  | 10                           | 94             | 33  | 10                           | 94             | 33  |
| 11                          | 100            | 47  | 11                           | 97             | 40  | 11                           | 97             | 42  |
| 12                          | 104            | 59  | 12                           | 100            | 47  | 12                           | 100            | 49  |
| 13                          | 107            | 68  | 13                           | 103            | 54  | 13                           | 104            | 58  |
| 14                          | 110            | 75  | 14                           | 106            | 62  | 14                           | 107            | 68  |
| 15                          | 113            | 85  | 15                           | 109            | 73  | 15                           | 110            | 76  |
| 16                          | 116            | 89  | 16                           | 112            | 81  | 16                           | 114            | 84  |
| 17                          | 119            | 95  | 17                           | 116            | 90  | 17                           | 117            | 91  |
| 18                          | 123            | 97  | 18                           | 119            | 96  | 18                           | 120            | 96  |
| 19                          | 126            | 99  | 19                           | 122            | 99  | 19                           | 123            | 100 |
| 20                          | 129            | 100 | 20                           | 125            | 100 | 20                           | 127            |     |

Fortsetzung Tabelle 6. Altersspezifische Normen

| Über 60 Jahre<br>(n = 240) |                |     |
|----------------------------|----------------|-----|
| RW                         | OPLIS-<br>Wert | PR  |
| 0                          | 58             | 1   |
| 1                          | 62             | 2   |
| 2                          | 65             | 3   |
| 3                          | 69             | 5   |
| 4                          | 73             | 6   |
| 5                          | 76             | 8   |
| 6                          | 80             | 13  |
| 7                          | 83             | 17  |
| 8                          | 87             | 22  |
| 9                          | 91             | 28  |
| 10                         | 94             | 34  |
| 11                         | 98             | 45  |
| 12                         | 101            | 54  |
| 13                         | 105            | 65  |
| 14                         | 109            | 74  |
| 15                         | 112            | 83  |
| 16                         | 116            | 90  |
| 17                         | 120            | 94  |
| 18                         | 123            | 97  |
| 19                         | 127            | 100 |
| 20                         | 130            |     |

### 4.3. Altersspezifische Normen – Weiblich

Tabelle 7. Altersspezifische Normen für Frauen

| Frauen - Unter 20 Jahre<br>(n = 72) |                |     | Frauen - 20 bis 39 Jahre<br>(n = 339) |                |     | Frauen - 40 bis 59 Jahre<br>(n = 415) |                |     |
|-------------------------------------|----------------|-----|---------------------------------------|----------------|-----|---------------------------------------|----------------|-----|
| RW                                  | OPLIS-<br>Wert | PR  | RW                                    | OPLIS-<br>Wert | PR  | RW                                    | OPLIS-<br>Wert | PR  |
| 0                                   | 68             | 1   | 0                                     | 63             | 2   | 0                                     | 63             | 1   |
| 1                                   | 71             | 4   | 1                                     | 66             | 3   | 1                                     | 66             | 3   |
| 2                                   | 74             | 8   | 2                                     | 70             | 4   | 2                                     | 70             | 4   |
| 3                                   | 78             | 11  | 3                                     | 73             | 7   | 3                                     | 73             | 6   |
| 4                                   | 81             | 18  | 4                                     | 76             | 11  | 4                                     | 76             | 10  |
| 5                                   | 84             | 19  | 5                                     | 80             | 14  | 5                                     | 80             | 13  |
| 6                                   | 87             | 25  | 6                                     | 83             | 18  | 6                                     | 83             | 17  |
| 7                                   | 90             | 29  | 7                                     | 86             | 22  | 7                                     | 87             | 22  |
| 8                                   | 93             |     | 8                                     | 89             | 26  | 8                                     | 90             | 29  |
| 9                                   | 96             | 43  | 9                                     | 93             | 31  | 9                                     | 93             | 34  |
| 10                                  | 99             | 47  | 10                                    | 96             | 39  | 10                                    | 97             | 42  |
| 11                                  | 102            | 56  | 11                                    | 99             | 48  | 11                                    | 100            | 52  |
| 12                                  | 106            | 64  | 12                                    | 103            | 55  | 12                                    | 103            | 59  |
| 13                                  | 109            | 72  | 13                                    | 106            | 63  | 13                                    | 107            | 67  |
| 14                                  | 112            | 81  | 14                                    | 109            | 71  | 14                                    | 110            | 77  |
| 15                                  | 115            | 86  | 15                                    | 112            | 83  | 15                                    | 114            | 84  |
| 16                                  | 118            | 90  | 16                                    | 116            | 90  | 16                                    | 117            | 90  |
| 17                                  | 121            | 96  | 17                                    | 119            | 95  | 17                                    | 120            | 94  |
| 18                                  | 124            | 99  | 18                                    | 122            | 98  | 18                                    | 124            | 98  |
| 19                                  | 127            | 100 | 19                                    | 126            | 100 | 19                                    | 127            | 100 |
| 20                                  | 130            |     | 20                                    | 129            |     | 20                                    | 129            |     |

Fortsetzung Tabelle 7. Altersspezifische Normen für Frauen

Frauen - Über 60 Jahre  
(n = 107)

| RW | OPLIS-<br>Wert | PR  |
|----|----------------|-----|
| 0  | 55             | 2   |
| 1  | 59             | 3   |
| 2  | 63             |     |
| 3  | 67             |     |
| 4  | 71             | 4   |
| 5  | 75             | 7   |
| 6  | 79             | 15  |
| 7  | 83             | 19  |
| 8  | 87             | 21  |
| 9  | 91             | 27  |
| 10 | 95             | 33  |
| 11 | 99             | 47  |
| 12 | 103            | 59  |
| 13 | 107            | 73  |
| 14 | 111            | 83  |
| 15 | 115            | 89  |
| 16 | 119            | 95  |
| 17 | 123            | 97  |
| 18 | 127            | 99  |
| 19 | 131            | 100 |
| 20 | 135            |     |

#### 4.4. Altersspezifische Normen – Männlich

Tabelle 8. Altersspezifische Normen für Männer

| Männer - Unter 20 Jahre<br>(n = 61) |                |     | Männer - 20 bis 39 Jahre<br>(n = 353) |                |     | Männer - 40 bis 59 Jahre<br>(n = 457) |                |     |
|-------------------------------------|----------------|-----|---------------------------------------|----------------|-----|---------------------------------------|----------------|-----|
| RW                                  | OPLIS-<br>Wert | PR  | RW                                    | OPLIS-<br>Wert | PR  | RW                                    | OPLIS-<br>Wert | PR  |
| 0                                   | 61             | 2   | 0                                     | 60             | 2   | 0                                     | 58             | 2   |
| 1                                   | 64             |     | 1                                     | 63             | 3   | 1                                     | 61             | 3   |
| 2                                   | 67             |     | 2                                     | 66             | 4   | 2                                     | 64             | 4   |
| 3                                   | 71             | 8   | 3                                     | 70             | 7   | 3                                     | 68             | 5   |
| 4                                   | 74             |     | 4                                     | 73             | 7   | 4                                     | 71             | 7   |
| 5                                   | 77             | 13  | 5                                     | 76             | 10  | 5                                     | 74             | 9   |
| 6                                   | 81             | 15  | 6                                     | 79             | 13  | 6                                     | 78             | 12  |
| 7                                   | 84             | 18  | 7                                     | 82             | 16  | 7                                     | 81             | 14  |
| 8                                   | 88             | 20  | 8                                     | 85             | 19  | 8                                     | 84             | 16  |
| 9                                   | 91             | 25  | 9                                     | 88             | 23  | 9                                     | 88             | 20  |
| 10                                  | 94             | 36  | 10                                    | 91             | 28  | 10                                    | 91             | 26  |
| 11                                  | 98             | 38  | 11                                    | 94             | 33  | 11                                    | 94             | 33  |
| 12                                  | 101            | 54  | 12                                    | 97             | 39  | 12                                    | 98             | 40  |
| 13                                  | 104            | 62  | 13                                    | 100            | 45  | 13                                    | 101            | 50  |
| 14                                  | 108            | 69  | 14                                    | 104            | 52  | 14                                    | 104            | 60  |
| 15                                  | 111            | 84  | 15                                    | 107            | 63  | 15                                    | 108            | 70  |
| 16                                  | 114            | 89  | 16                                    | 110            | 73  | 16                                    | 111            | 79  |
| 17                                  | 118            | 93  | 17                                    | 113            | 86  | 17                                    | 114            | 89  |
| 18                                  | 121            | 95  | 18                                    | 116            | 94  | 18                                    | 118            | 95  |
| 19                                  | 125            | 98  | 19                                    | 119            | 97  | 19                                    | 121            | 99  |
| 20                                  | 128            | 100 | 20                                    | 122            | 100 | 20                                    | 124            | 100 |



Fortsetzung Tabelle 8. Altersspezifische Normen für Männer

Männer - Über 60 Jahre  
(n = 133)

| RW | OPLIS-<br>Wert | PR  |
|----|----------------|-----|
| 0  | 60             | 1   |
| 1  | 63             | 2   |
| 2  | 66             | 3   |
| 3  | 70             | 6   |
| 4  | 73             | 8   |
| 5  | 77             |     |
| 6  | 80             | 12  |
| 7  | 83             | 16  |
| 8  | 87             | 23  |
| 9  | 90             | 28  |
| 10 | 94             | 35  |
| 11 | 97             | 44  |
| 12 | 100            | 50  |
| 13 | 104            | 59  |
| 14 | 107            | 66  |
| 15 | 111            | 79  |
| 16 | 114            | 86  |
| 17 | 117            | 91  |
| 18 | 121            | 96  |
| 19 | 124            | 99  |
| 20 | 128            | 100 |

## 5. Zusätzliche Abbildungen und Tabellen zur Publikation

### 5.1. Visuelle Darstellung der Kriteriumsvalidierung

Abbildung 1. Kriteriumsvalidierung

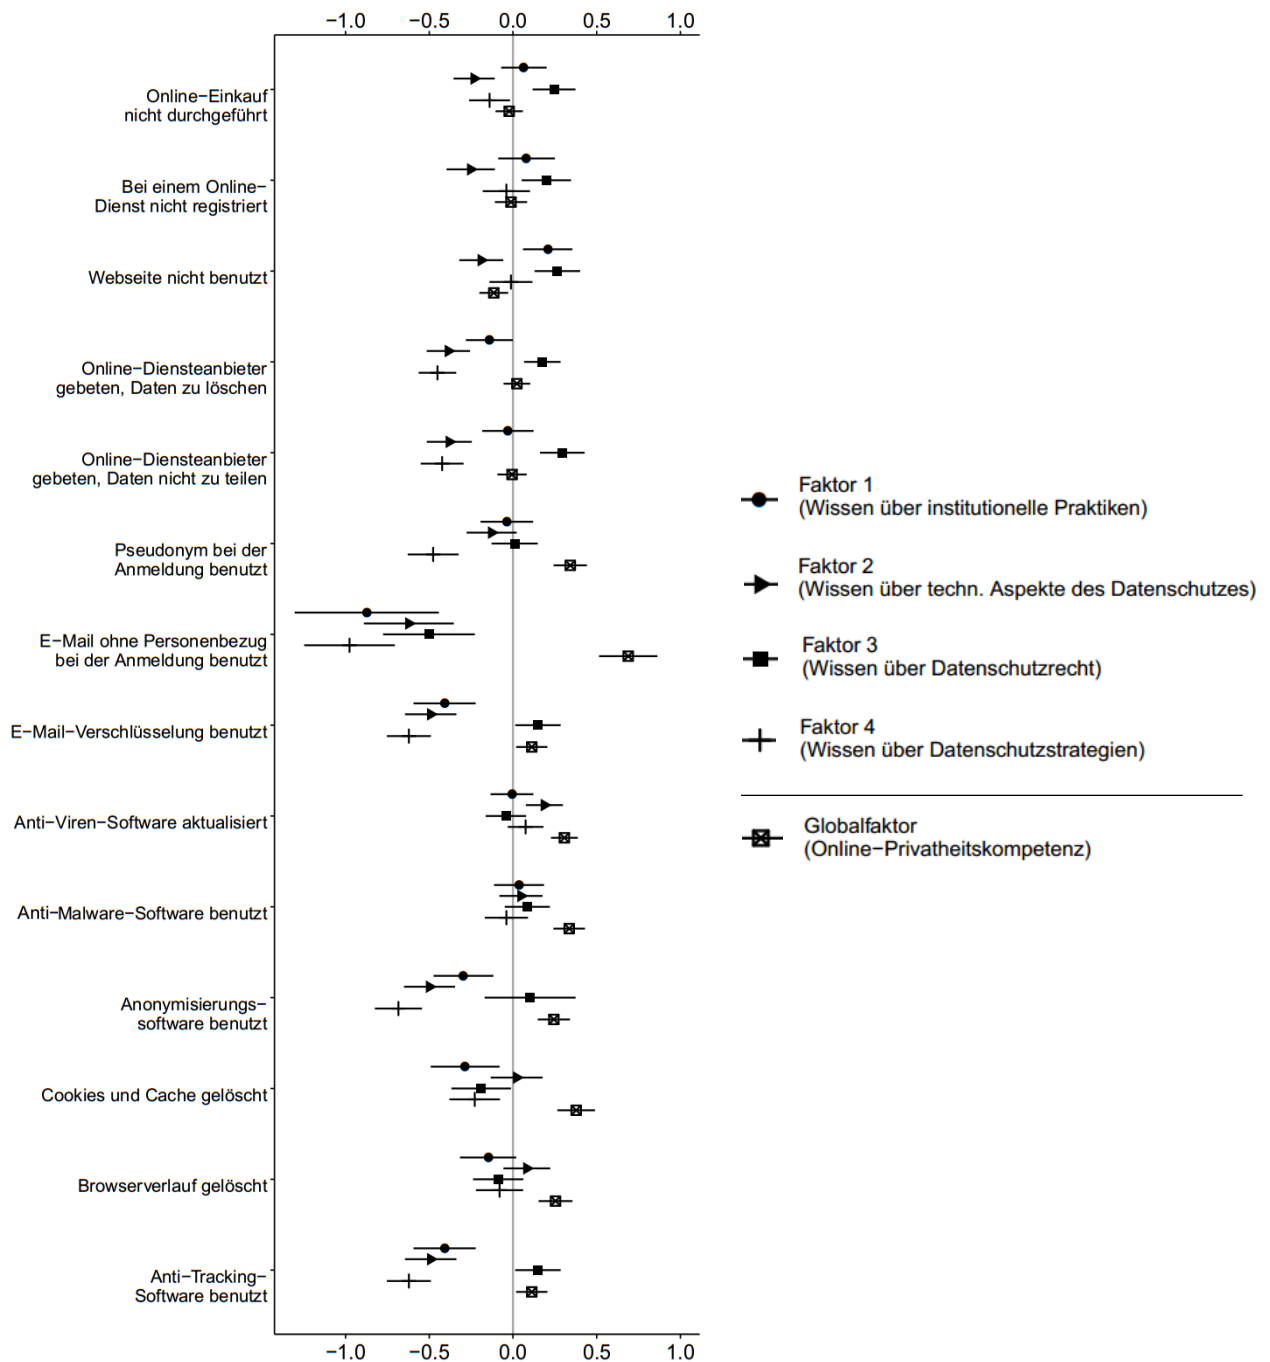

*Anmerkungen.* Für jede Kriteriumsvariable (auf der x-Achse abgetragene Datenschutzmaßnahme) wurde ein Strukturgleichungsmodell geschätzt, bei dem alle Faktoren des Bi-Faktor-Modells (vier spezifische und ein Globalfaktor) die jeweilige Kriteriumsvariable vorhersagen. Abgetragen sind die unstandardisierten Regressionskoeffizienten mit den 95%-Konfidenzintervallen.

## 5.2. Soziodemographie der Validierungsstichprobe

Tabelle 9. Übersicht über die Soziodemographie der Quotenstichprobe (Studie 3)

|                                                                | Anteil in der<br>Stichprobe<br>(%) | Anteil in der Be-<br>völkerung <sup>2</sup><br>(%) |
|----------------------------------------------------------------|------------------------------------|----------------------------------------------------|
| <b>Geschlecht</b>                                              |                                    |                                                    |
| Weiblich                                                       | 48                                 | 51                                                 |
| Männlich                                                       | 52                                 | 49                                                 |
| <b>Altersgruppen</b>                                           |                                    |                                                    |
| 14 bis 19 Jahre                                                | 9                                  | 8                                                  |
| 20 bis 29 Jahre                                                | 17                                 | 17                                                 |
| 30 bis 39 Jahre                                                | 19                                 | 16                                                 |
| 40 bis 49 Jahre                                                | 24                                 | 23                                                 |
| 50 bis 59 Jahre                                                | 20                                 | 21                                                 |
| 60 bis 69 Jahre                                                | 11                                 | 15                                                 |
| <b>Bildung</b>                                                 |                                    |                                                    |
| (noch) kein Schulabschluss                                     | 3                                  | 6                                                  |
| Hauptschulabschluss ohne Lehre/Berufsausbildung                | 5                                  | 5                                                  |
| Hauptschulabschluss mit abgeschlossener Lehre/Berufsausbildung | 22                                 | 21                                                 |
| weiterführende Schule ohne Abitur (Realschulabschluss)         | 35                                 | 34                                                 |
| Abitur, (Fach-) Hochschulreife ohne Studium                    | 17                                 | 17                                                 |
| Studium                                                        | 18                                 | 18                                                 |
| <b>Bundesland</b>                                              |                                    |                                                    |
| Baden-Württemberg                                              | 12                                 | 14                                                 |
| Bayern                                                         | 16                                 | 16                                                 |
| Berlin                                                         | 5                                  | 5                                                  |
| Brandenburg                                                    | 2                                  | 3                                                  |
| Bremen                                                         | 1                                  | 1                                                  |
| Hamburg                                                        | 2                                  | 2                                                  |
| Hessen                                                         | 8                                  | 8                                                  |
| Mecklenburg-Vorpommern                                         | 2                                  | 2                                                  |
| Niedersachsen                                                  | 9                                  | 10                                                 |
| Nordrhein-Westfalen                                            | 21                                 | 22                                                 |
| Rheinland-Pfalz                                                | 5                                  | 5                                                  |
| Saarland                                                       | 1                                  | 1                                                  |
| Sachsen                                                        | 5                                  | 5                                                  |
| Sachsen-Anhalt                                                 | 2                                  | 3                                                  |
| Schleswig-Holstein                                             | 3                                  | 4                                                  |
| Thüringen                                                      | 3                                  | 2                                                  |

<sup>2</sup> „b4p – best for planning“-Studie (Gesellschaft für integrierte Kommunikationsforschung, 2014).

## Literaturverzeichnis

DiStefano, C., Zhu, M. & Míndrilă. (2009). Understanding and using factors scores: Considerations for the applied researchers. *Practical Assessment, Research & Evaluation*, 14(20), 1–11. Zugriff am 07.10.2016  
<http://pareonline.net/getvn.asp?v=14&n=20>

Gesellschaft für integrierte Kommunikationsforschung. (2014). *b4p - best for planning*. Zugriff am 07.10.2016  
<http://www.b4p.de/>

Muthén, B.O. (1998-2004). *Mplus Technical Appendices*. Los Angeles, CA: Muthén & Muthén. Zugriff am 07.10.2016  
<https://www.statmodel.com/download/techappen.pdf>
